# Supplementary material for: Single nucleotide polymorphisms of nucleotide excision repair pathway are significantly associated with outcomes of platinum-based chemotherapy in lung cancer
Source: PubMed Central journal article supplement (PMC5603542; doi:10.1038/s41598-017-08257-7), 2017-09-18
Supplement: 41598_2017_8257_MOESM1_ESM.pdf [file 41598_2017_8257_MOESM1_ESM.pdf]

Single nucleotide polymorphisms of nucleotide excision repair pathway are significantly associated with outcomes of platinum-based chemotherapy in lung cancer

Xiao Song<sup>1,2#</sup>, Shiming Wang<sup>1#</sup>, Xuan Hong<sup>3#</sup>, Xiaoying Li<sup>1</sup>, Xueying Zhao<sup>1</sup>, Cong Huai<sup>1</sup>, Hongyan Chen<sup>1</sup>, Zhiqiang Gao<sup>4</sup>, Ji Qian<sup>1</sup>, Jiucun Wang<sup>1</sup>, Baohui Han<sup>4</sup>, Chunxue Bai<sup>5</sup>, Qiang Li<sup>6</sup>, Junjie Wu<sup>1</sup>, Daru Lu<sup>1\*</sup>

| Gene         | NCBI SNP ID | Position <sup>a</sup> | Functional Consequence | Base Change | HWE ( <i>P</i> -value) | Genotyping rate (%) | MAF   | Genotype frequency |              |             |
|--------------|-------------|-----------------------|------------------------|-------------|------------------------|---------------------|-------|--------------------|--------------|-------------|
|              |             |                       |                        |             |                        |                     |       | Wild Type          | Heterozygote | Mutant Type |
| <i>RPA2</i>  | rs7356      | chr1:27891589         | 3'UTR                  | G:A         | 0.992                  | 99.8                | 0.450 | 304 (30.3%)        | 495 (49.4%)  | 203 (20.3%) |
|              | rs17257252  | chr1:27893973         | intron                 | C:A         | 0.214                  | 100.0               | 0.125 | 763 (76.0%)        | 230 (22.9%)  | 11 (1.1%)   |
| <i>XPC</i>   | rs2228001   | chr3:14145949         | missense               | A:C         | 0.819                  | 97.5                | 0.354 | 410 (41.9%)        | 444 (45.4%)  | 125 (12.8%) |
|              | rs2733533   | chr3:14147200         | intron                 | C:A         | 1.000                  | 100.0               | 0.048 | 909 (90.5%)        | 93 (9.3%)    | 2 (0.2%)    |
|              | rs2607737   | chr3:14151668         | intron                 | G:A         | 0.888                  | 100.0               | 0.295 | 497 (49.5%)        | 421 (41.9%)  | 86 (8.6%)   |
|              | rs3731114   | chr3:14165122         | intron                 | G:C         | 0.078                  | 94.8                | 0.202 | 616 (64.7%)        | 288 (30.3%)  | 48 (5.0%)   |
|              | rs3731054   | chr3:14179017         | 5'flanking             | C:G         | 0.930                  | 99.8                | 0.336 | 443 (44.2%)        | 445 (44.4%)  | 114 (11.4%) |
| <i>RFC1</i>  | rs1057807   | chr4:39287853         | 3'UTR                  | A:G         | 0.717                  | 100.0               | 0.363 | 411 (40.9%)        | 458 (45.6%)  | 135 (13.4%) |
|              | rs13147094  | chr4:39309262         | intron                 | G:A         | 1.000                  | 100.0               | 0.193 | 654 (65.1%)        | 313 (31.2%)  | 37 (3.7%)   |
|              | rs7658917   | chr4:39332767         | intron                 | G:A         | 1.000                  | 100.0               | 0.414 | 345 (34.4%)        | 487 (48.5%)  | 172 (17.1%) |
|              | rs3796517   | chr4:39335333         | intron                 | A:G         | 0.733                  | 100.0               | 0.164 | 699 (69.6%)        | 280 (27.9%)  | 25 (2.5%)   |
|              | rs2306596   | chr4:39342320         | intron                 | A:C         | 1.000                  | 99.9                | 0.358 | 413 (41.2%)        | 462 (46.1%)  | 128 (12.8%) |
|              | rs17584703  | chr4:39363236         | intron                 | A:G         | 0.792                  | 100.0               | 0.256 | 557 (55.5%)        | 379 (37.7%)  | 68 (6.8%)   |
|              | rs6851075   | chr4:39366034         | intron                 | A:G         | 0.829                  | 99.9                | 0.172 | 689 (68.7%)        | 283 (28.2%)  | 31 (3.1%)   |
|              | rs3736168   | chr4:39366463         | 5'flanking             | G:A         | 0.633                  | 99.9                | 0.428 | 332 (33.1%)        | 483 (48.2%)  | 188 (18.7%) |
| <i>ERCC8</i> | rs3117      | chr5:60874510         | 3'UTR                  | A:G         | 1.000                  | 99.9                | 0.070 | 867 (86.4%)        | 131 (13.1%)  | 5 (0.5%)    |
|              | rs4647150   | chr5:60874778         | intron                 | G:A         | 0.405                  | 99.9                | 0.171 | 685 (68.3%)        | 293 (29.2%)  | 25 (2.5%)   |
|              | rs4647130   | chr5:60887482         | synonymous             | A:G         | 0.022                  | 99.8                | 0.072 | 868 (86.6%)        | 123 (12.3%)  | 11 (1.1%)   |
|              | rs12657309  | chr5:60910298         | intron                 | A:G         | 0.273                  | 99.8                | 0.220 | 603 (60.2%)        | 357 (35.6%)  | 42 (4.2%)   |
|              | rs976080    | chr5:60921824         | intron                 | C:A         | 0.951                  | 100.0               | 0.067 | 874 (87.1%)        | 125 (12.5%)  | 5 (0.5%)    |

|               |           |               |            |     |       |       |       |             |             |             |
|---------------|-----------|---------------|------------|-----|-------|-------|-------|-------------|-------------|-------------|
|               | rs158922  | chr5:60945159 | 5'UTR      | G:A | 1.000 | 100.0 | 0.070 | 868 (86.5%) | 131 (13.0%) | 5 (0.5%)    |
|               | rs158920  | chr5:60945441 | 5'UTR      | G:A | 0.537 | 99.9  | 0.099 | 816 (81.4%) | 175 (17.4%) | 12 (1.2%)   |
| <i>CDK7</i>   | rs2972363 | chr5:69257549 | intron     | G:A | 1.000 | 100.0 | 0.177 | 680 (67.7%) | 293 (29.2%) | 31 (3.1%)   |
|               | rs4423955 | chr5:69272148 | intron     | G:A | 0.233 | 99.8  | 0.424 | 323 (32.2%) | 509 (50.8%) | 170 (17.0%) |
|               | rs6865178 | chr5:69274130 | intron     | G:A | 0.264 | 100.0 | 0.442 | 303 (30.2%) | 514 (51.2%) | 187 (18.6%) |
| <i>CCNH</i>   | rs2230641 | chr5:87399457 | missense   | A:G | 0.027 | 100.0 | 0.102 | 803 (80.0%) | 197 (19.6%) | 4 (0.4%)    |
|               | rs3093816 | chr5:87401570 | intron     | G:A | 0.673 | 100.0 | 0.479 | 269 (26.8%) | 509 (50.7%) | 226 (22.5%) |
|               | rs2290280 | chr5:87412904 | 5'UTR      | C:A | 0.004 | 100.0 | 0.135 | 762 (75.9%) | 212 (21.1%) | 30 (3.0%)   |
|               | rs1807895 | chr5:87413020 | 5'UTR      | A:C | 0.619 | 99.6  | 0.355 | 420 (42.0%) | 450 (45.0%) | 130 (13.0%) |
| <i>GTF2H4</i> | rs3130780 | chr6:30906531 | 5'flanking | C:A | 1.000 | 100.0 | 0.054 | 899 (89.5%) | 102 (10.2%) | 3 (0.3%)    |
|               | rs2284175 | chr6:30907368 | 5'flanking | G:A | 0.568 | 100.0 | 0.409 | 355 (35.4%) | 476 (47.4%) | 173 (17.2%) |
|               | rs3218803 | chr6:30907503 | 5'flanking | A:G | 0.568 | 100.0 | 0.409 | 355 (35.4%) | 476 (47.4%) | 173 (17.2%) |
|               | rs3218804 | chr6:30907826 | 5'flanking | G:A | 0.314 | 100.0 | 0.076 | 855 (85.2%) | 146 (14.5%) | 3 (0.3%)    |
|               | rs2284176 | chr6:30907845 | 5'flanking | G:A | 0.606 | 99.5  | 0.411 | 351 (35.1%) | 475 (47.5%) | 173 (17.3%) |
|               | rs3218806 | chr6:30907887 | 5'flanking | A:C | 0.677 | 99.4  | 0.411 | 350 (35.1%) | 476 (47.7%) | 172 (17.2%) |
|               | rs1264309 | chr6:30908122 | 5'flanking | A:G | 0.520 | 99.4  | 0.264 | 536 (53.7%) | 397 (39.8%) | 65 (6.5%)   |
|               | rs2074510 | chr6:30908257 | 5'UTR      | A:C | 0.568 | 100.0 | 0.409 | 355 (35.4%) | 476 (47.4%) | 173 (17.2%) |
|               | rs1052693 | chr6:30908375 | 5'UTR      | A:G | 0.546 | 99.9  | 0.409 | 355 (35.4%) | 475 (47.4%) | 173 (17.2%) |
|               | rs3218822 | chr6:30912559 | intron     | A:G | 0.535 | 100.0 | 0.066 | 877 (87.4%) | 121 (12.1%) | 6 (0.6%)    |
| <i>POLD2</i>  | rs3087363 | chr7:44118068 | intron     | G:A | 0.119 | 100.0 | 0.077 | 860 (85.7%) | 134 (13.3%) | 10 (1.0%)   |
|               | rs3087370 | chr7:44122210 | 5'UTR      | A:G | 0.588 | 100.0 | 0.236 | 583 (58.1%) | 369 (36.8%) | 52 (5.2%)   |
|               | rs2979422 | chr7:44122756 | intron     | A:G | 0.233 | 100.0 | 0.203 | 644 (64.1%) | 312 (31.1%) | 48 (4.8%)   |
|               | rs3757843 | chr7:44123958 | 5'flanking | G:A | 0.873 | 99.8  | 0.216 | 617 (61.6%) | 337 (33.6%) | 48 (4.8%)   |
| <i>RFC2</i>   | rs3135712 | chr7:74232049 | 3'UTR      | G:A | 0.767 | 100.0 | 0.089 | 835 (83.2%) | 160 (15.9%) | 9 (0.9%)    |
|               | rs3135695 | chr7:74236235 | intron     | C:A | 0.867 | 99.9  | 0.115 | 785 (78.3%) | 206 (20.5%) | 12 (1.2%)   |

|               |            |                |            |     |       |       |       |             |             |             |
|---------------|------------|----------------|------------|-----|-------|-------|-------|-------------|-------------|-------------|
|               | rs3135670  | chr7:74246577  | intron     | A:C | 1.000 | 94.2  | 0.084 | 794 (83.9%) | 146 (15.4%) | 6 (0.6%)    |
| <i>XPA</i>    | rs3176721  | chr9:97679912  | intron     | C:A | 1.000 | 100.0 | 0.112 | 792 (78.9%) | 200 (19.9%) | 12 (1.2%)   |
|               | rs3176690  | chr9:97685195  | intron     | A:C | 1.000 | 100.0 | 0.081 | 847 (84.4%) | 151 (15.0%) | 6 (0.6%)    |
|               | rs3176689  | chr9:97685514  | intron     | A:T | 0.387 | 98.7  | 0.356 | 418 (42.2%) | 441 (44.5%) | 132 (13.3%) |
|               | rs3176658  | chr9:97691581  | intron     | G:A | 0.815 | 99.2  | 0.248 | 565 (56.7%) | 368 (36.9%) | 63 (6.3%)   |
|               | rs1800975  | chr9:96797296  | 5'UTR      | A:G | 0.763 | 99.8  | 0.498 | 250 (25.0%) | 507 (50.6%) | 245 (24.5%) |
| <i>RAD23B</i> | rs7041137  | chr9:107282291 | 5'flanking | G:A | 0.184 | 100.0 | 0.211 | 633 (63.0%) | 319 (31.8%) | 52 (5.2%)   |
|               | rs17195974 | chr9:107285391 | intron     | A:G | 1.000 | 99.9  | 0.215 | 618 (61.6%) | 339 (33.8%) | 46 (4.6%)   |
|               | rs7031906  | chr9:107287196 | intron     | C:A | 0.597 | 95.5  | 0.249 | 544 (56.7%) | 352 (36.7%) | 63 (6.6%)   |
|               | rs10816484 | chr9:107289586 | intron     | A:G | 1.000 | 100.0 | 0.376 | 391 (38.9%) | 471 (46.9%) | 142 (14.1%) |
| <i>ERCC6</i>  | rs11101137 | chr10:49456985 | 3'UTR      | A:G | 0.939 | 100.0 | 0.390 | 374 (37.3%) | 476 (47.4%) | 154 (15.3%) |
|               | rs3750751  | chr10:49457882 | 3'UTR      | G:A | 0.218 | 100.0 | 0.167 | 691 (68.8%) | 291 (29.0%) | 22 (2.2%)   |
|               | rs4253231  | chr10:49458762 | 3'UTR      | A:G | 0.192 | 100.0 | 0.168 | 689 (68.6%) | 293 (29.2%) | 22 (2.2%)   |
|               | rs4838519  | chr10:49462211 | intron     | A:C | 0.777 | 99.9  | 0.489 | 265 (26.4%) | 496 (49.5%) | 242 (24.1%) |
|               | rs4253212  | chr10:49470166 | intron     | G:A | 0.850 | 99.9  | 0.110 | 796 (79.4%) | 194 (19.3%) | 13 (1.3%)   |
|               | rs2228526  | chr10:49470671 | missense   | A:G | 0.906 | 100.0 | 0.053 | 899 (89.5%) | 103 (10.3%) | 2 (0.2%)    |
|               | rs12571445 | chr10:49514137 | intron     | A:G | 0.880 | 100.0 | 0.085 | 841 (83.8%) | 155 (15.4%) | 8 (0.8%)    |
|               | rs2281793  | chr10:49519496 | intron     | G:A | 0.417 | 99.7  | 0.323 | 453 (45.3%) | 450 (45.0%) | 98 (9.8%)   |
|               | rs2228528  | chr10:49524234 | missense   | G:A | 0.575 | 100.0 | 0.459 | 299 (29.8%) | 489 (48.7%) | 216 (21.5%) |
|               | rs4253002  | chr10:49539292 | 5'flanking | G:A | 0.301 | 100.0 | 0.046 | 916 (91.2%) | 84 (8.4%)   | 4 (0.4%)    |
| <i>GTF2H1</i> | rs3802968  | chr11:18322331 | 5'flanking | G:A | 0.875 | 100.0 | 0.024 | 957 (95.3%) | 46 (4.6%)   | 1 (0.1%)    |
|               | rs4150558  | chr11:18332808 | intron     | T:A | 0.978 | 97.6  | 0.061 | 865 (88.3%) | 111 (11.3%) | 4 (0.4%)    |
|               | rs4150628  | chr11:18344321 | intron     | A:G | 0.296 | 100.0 | 0.135 | 746 (74.3%) | 244 (24.3%) | 14 (1.4%)   |
|               | rs4150667  | chr11:18361364 | intron     | G:A | 0.387 | 100.0 | 0.298 | 488 (48.6%) | 433 (43.1%) | 83 (8.3%)   |
| <i>DDB2</i>   | rs12578030 | chr11:47213050 | 5'flanking | A:G | 0.841 | 100.0 | 0.044 | 917 (91.3%) | 86 (8.6%)   | 1 (0.1%)    |

|               |            |                 |            |     |       |       |       |             |             |             |
|---------------|------------|-----------------|------------|-----|-------|-------|-------|-------------|-------------|-------------|
|               | rs2029298  | chr11:47213167  | 5'flanking | G:A | 0.356 | 100.0 | 0.302 | 496 (49.4%) | 410 (40.8%) | 98 (9.8%)   |
|               | rs11039138 | chr11:47227672  | intron     | G:A | 0.315 | 100.0 | 0.027 | 952 (94.8%) | 50 (5.0%)   | 2 (0.2%)    |
|               | rs2306353  | chr11:47235157  | intron     | A:G | 0.806 | 99.9  | 0.328 | 455 (45.4%) | 438 (43.7%) | 110 (11.0%) |
|               | rs4647756  | chr11:47237428  | intron     | A:C | 0.932 | 100.0 | 0.053 | 900 (89.6%) | 102 (10.2%) | 2 (0.2%)    |
|               | rs326222   | chr11:47238117  | intron     | A:G | 0.720 | 100.0 | 0.244 | 577 (57.5%) | 365 (36.4%) | 62 (6.2%)   |
| <i>POLD4</i>  | rs1790735  | chr11:67355012  | 5'flanking | A:G | 0.065 | 100.0 | 0.139 | 752 (74.9%) | 225 (22.4%) | 27 (2.7%)   |
| <i>POLD3</i>  | rs10899013 | chr11:74598497  | intron     | G:A | 0.774 | 100.0 | 0.234 | 591 (58.9%) | 356 (35.5%) | 57 (5.7%)   |
|               | rs7940880  | chr11:74606369  | intron     | G:A | 0.308 | 100.0 | 0.370 | 407 (40.5%) | 452 (45.0%) | 145 (14.4%) |
|               | rs6592576  | chr11:74615776  | intron     | G:A | 0.626 | 100.0 | 0.340 | 441 (43.9%) | 443 (44.1%) | 120 (12.0%) |
|               | rs6592577  | chr11:74616569  | intron     | A:G | 0.964 | 100.0 | 0.291 | 504 (50.2%) | 416 (41.4%) | 84 (8.4%)   |
|               | rs12807883 | chr11:74616947  | intron     | A:G | 0.777 | 100.0 | 0.056 | 895 (89.1%) | 105 (10.5%) | 4 (0.4%)    |
|               | rs10857    | chr11:74642326  | 3'UTR      | A:C | 0.814 | 99.9  | 0.341 | 437 (43.6%) | 447 (44.6%) | 119 (11.9%) |
|               | rs1051076  | chr11:74642554  | 3'UTR      | A:G | 1.000 | 100.0 | 0.040 | 924 (92.0%) | 79 (7.9%)   | 1 (0.1%)    |
| <i>GTF2H3</i> | rs10773020 | chr12:123632542 | 5'flanking | A:C | 1.000 | 100.0 | 0.087 | 836 (83.3%) | 161 (16.0%) | 7 (0.7%)    |
|               | rs10846535 | chr12:123645841 | intron     | A:G | 0.769 | 99.8  | 0.150 | 726 (72.5%) | 252 (25.1%) | 24 (2.4%)   |
|               | rs11057318 | chr12:123655941 | intron     | G:A | 0.021 | 100.0 | 0.056 | 899 (89.5%) | 97 (9.7%)   | 8 (0.8%)    |
|               | rs6488888  | chr12:123658044 | intron     | A:G | 0.443 | 100.0 | 0.063 | 879 (87.5%) | 123 (12.3%) | 2 (0.2%)    |
| <i>POLE</i>   | rs14302    | chr12:132624162 | 3'UTR      | G:A | 0.835 | 99.9  | 0.208 | 630 (62.8%) | 328 (32.7%) | 45 (4.5%)   |
|               | rs4883543  | chr12:132625418 | intron     | A:G | 0.458 | 99.9  | 0.320 | 458 (45.7%) | 448 (44.7%) | 97 (9.7%)   |
|               | rs4883624  | chr12:132636151 | intron     | A:G | 0.270 | 100.0 | 0.322 | 453 (45.1%) | 455 (45.3%) | 96 (9.6%)   |
|               | rs11146986 | chr12:132641691 | synonymous | G:A | 0.240 | 100.0 | 0.093 | 823 (82.0%) | 176 (17.5%) | 5 (0.5%)    |
|               | rs11609456 | chr12:132654462 | intron     | A:G | 0.546 | 99.9  | 0.112 | 789 (78.7%) | 204 (20.3%) | 10 (1.0%)   |
|               | rs5744751  | chr12:132677409 | missense   | G:A | 0.733 | 100.0 | 0.113 | 789 (78.6%) | 204 (20.3%) | 11 (1.1%)   |
| <i>ERCC5</i>  | rs2094258  | chr13:102844409 | 5'flanking | G:A | 0.681 | 100.0 | 0.387 | 373 (37.2%) | 484 (48.2%) | 147 (14.6%) |
|               | rs751402   | chr13:102845848 | 5'UTR      | G:A | 0.845 | 99.5  | 0.335 | 440 (44.0%) | 449 (44.9%) | 110 (11.0%) |

|              |            |                 |            |     |       |       |       |             |             |             |
|--------------|------------|-----------------|------------|-----|-------|-------|-------|-------------|-------------|-------------|
|              | rs2296147  | chr13:102846025 | 5'UTR      | A:G | 0.875 | 99.9  | 0.211 | 625 (62.3%) | 332 (33.1%) | 46 (4.6%)   |
|              | rs16960632 | chr13:102847365 | intron     | A:G | 0.116 | 100.0 | 0.143 | 731 (72.8%) | 259 (25.8%) | 14 (1.4%)   |
|              | rs4771436  | chr13:102849670 | intron     | A:C | 0.506 | 99.3  | 0.295 | 490 (49.1%) | 425 (42.6%) | 82 (8.2%)   |
|              | rs1047768  | chr13:102852167 | synonymous | A:G | 0.475 | 99.9  | 0.279 | 516 (51.4%) | 414 (41.3%) | 73 (7.3%)   |
|              | rs2228959  | chr13:102865812 | synonymous | C:A | 0.166 | 100.0 | 0.074 | 865 (86.2%) | 130 (12.9%) | 9 (0.9%)    |
|              | rs4150339  | chr13:102867901 | intron     | A:G | 0.159 | 100.0 | 0.084 | 847 (84.4%) | 146 (14.5%) | 11 (1.1%)   |
|              | rs4150360  | chr13:102872412 | intron     | G:A | 0.674 | 100.0 | 0.213 | 625 (62.3%) | 331 (33.0%) | 48 (4.8%)   |
|              | rs8002276  | chr13:102873789 | intron     | A:G | 0.780 | 99.9  | 0.426 | 328 (32.7%) | 496 (49.5%) | 179 (17.8%) |
|              | rs4150383  | chr13:102874880 | intron     | G:A | 0.375 | 100.0 | 0.048 | 912 (90.8%) | 88 (8.8%)   | 4 (0.4%)    |
|              | rs17655    | chr13:102875652 | missense   | C:G | 0.939 | 99.0  | 0.495 | 254 (25.6%) | 495 (49.8%) | 245 (24.6%) |
|              | rs873601   | chr13:102875987 | 3'UTR      | G:A | 0.814 | 100.0 | 0.478 | 271 (27.0%) | 506 (50.4%) | 227 (22.6%) |
| <i>POLE2</i> | rs6572597  | chr14:49662797  | intron     | A:C | 0.813 | 100.0 | 0.178 | 677 (67.4%) | 297 (29.6%) | 30 (3.0%)   |
| <i>MNAT1</i> | rs17256107 | chr14:60762073  | intron     | A:G | 0.708 | 100.0 | 0.277 | 527 (52.5%) | 397 (39.5%) | 80 (8.0%)   |
|              | rs4151190  | chr14:60786235  | intron     | A:G | 0.652 | 100.0 | 0.317 | 465 (46.3%) | 442 (44.0%) | 97 (9.7%)   |
|              | rs2300471  | chr14:60797351  | intron     | A:G | 0.081 | 100.0 | 0.124 | 765 (76.2%) | 230 (22.9%) | 9 (0.9%)    |
|              | rs2020892  | chr14:60811966  | intron     | A:G | 1.000 | 99.9  | 0.108 | 798 (79.6%) | 193 (19.2%) | 12 (1.2%)   |
|              | rs4151240  | chr14:60829515  | intron     | G:A | 0.047 | 100.0 | 0.149 | 719 (71.6%) | 271 (27.0%) | 14 (1.4%)   |
|              | rs4151279  | chr14:60869987  | intron     | A:C | 1.000 | 99.6  | 0.067 | 870 (87.0%) | 126 (12.6%) | 4 (0.4%)    |
|              | rs4151285  | chr14:60870717  | intron     | A:T | 1.000 | 99.2  | 0.130 | 755 (75.8%) | 224 (22.5%) | 17 (1.7%)   |
|              | rs4151351  | chr14:60916029  | intron     | G:A | 0.159 | 99.8  | 0.411 | 336 (33.5%) | 508 (50.7%) | 158 (15.8%) |
|              | rs4151361  | chr14:60931688  | intron     | A:C | 0.803 | 99.9  | 0.120 | 775 (77.3%) | 215 (21.4%) | 13 (1.3%)   |
|              | rs4151374  | chr14:60935235  | intron     | A:G | 0.609 | 100.0 | 0.325 | 453 (45.1%) | 449 (44.7%) | 102 (10.2%) |
|              | rs7156087  | chr14:60935600  | intron     | G:A | 0.204 | 99.9  | 0.197 | 640 (63.8%) | 331 (33.0%) | 32 (3.2%)   |
|              | rs4151393  | chr14:60952744  | intron     | G:A | 1.000 | 99.9  | 0.124 | 770 (76.8%) | 218 (21.7%) | 15 (1.5%)   |
|              | rs4151405  | chr14:60967503  | intron     | A:C | 0.211 | 100.0 | 0.170 | 685 (68.2%) | 296 (29.5%) | 23 (2.3%)   |

|              |            |                |            |     |       |       |       |             |             |             |
|--------------|------------|----------------|------------|-----|-------|-------|-------|-------------|-------------|-------------|
|              | rs4151408  | chr14:60968059 | intron     | G:A | 0.770 | 99.9  | 0.171 | 691 (68.9%) | 281 (28.0%) | 31 (3.1%)   |
| <i>ERCC4</i> | rs3136038  | chr16:13919522 | 5'flanking | G:A | 1.000 | 100.0 | 0.253 | 559 (55.7%) | 381 (37.9%) | 64 (6.4%)   |
|              | rs31870    | chr16:13943873 | intron     | G:A | 0.975 | 100.0 | 0.193 | 654 (65.1%) | 312 (31.1%) | 38 (3.8%)   |
|              | rs1799801  | chr16:13948101 | synonymous | A:G | 0.508 | 99.9  | 0.233 | 586 (58.4%) | 367 (36.6%) | 50 (5.0%)   |
|              | rs11075223 | chr16:13950860 | 3'UTR      | C:A | 0.760 | 100.0 | 0.226 | 599 (59.7%) | 356 (35.5%) | 49 (4.9%)   |
|              | rs4781562  | chr16:13951379 | 3'UTR      | C:A | 0.624 | 100.0 | 0.231 | 591 (58.9%) | 363 (36.2%) | 50 (5.0%)   |
| <i>RPAI</i>  | rs12952857 | chr17:1829006  | 5'flanking | A:G | 1.000 | 100.0 | 0.453 | 300 (29.9%) | 498 (49.6%) | 206 (20.5%) |
|              | rs8065937  | chr17:1829683  | 5'flanking | C:A | 0.593 | 100.0 | 0.397 | 369 (36.8%) | 472 (47.0%) | 163 (16.2%) |
|              | rs5030749  | chr17:1830105  | synonymous | A:G | 0.970 | 100.0 | 0.369 | 401 (39.9%) | 466 (46.4%) | 137 (13.6%) |
|              | rs2287321  | chr17:1853057  | intron     | G:A | 0.951 | 100.0 | 0.440 | 316 (31.5%) | 493 (49.1%) | 195 (19.4%) |
|              | rs6416887  | chr17:1854184  | intron     | A:G | 0.995 | 99.6  | 0.197 | 646 (64.6%) | 315 (31.5%) | 39 (3.9%)   |
|              | rs11078676 | chr17:1865283  | intron     | G:A | 0.409 | 100.0 | 0.250 | 560 (55.8%) | 387 (38.5%) | 57 (5.7%)   |
|              | rs3786136  | chr17:1869979  | intron     | G:A | 1.000 | 100.0 | 0.143 | 737 (73.4%) | 246 (24.5%) | 21 (2.1%)   |
|              | rs12150513 | chr17:1871298  | intron     | A:C | 0.370 | 98.9  | 0.235 | 576 (58.0%) | 368 (37.1%) | 49 (4.9%)   |
|              | rs8067195  | chr17:1874978  | intron     | A:G | 0.363 | 99.9  | 0.171 | 693 (69.1%) | 276 (27.5%) | 34 (3.4%)   |
|              | rs2230930  | chr17:1879663  | synonymous | G:A | 0.902 | 100.0 | 0.449 | 303 (30.2%) | 500 (49.8%) | 201 (20.0%) |
|              | rs9909163  | chr17:1885352  | intron     | A:G | 1.000 | 100.0 | 0.378 | 388 (38.6%) | 473 (47.1%) | 143 (14.2%) |
|              | rs2270412  | chr17:1888880  | intron     | G:A | 0.150 | 100.0 | 0.323 | 450 (44.8%) | 460 (45.8%) | 94 (9.4%)   |
|              | rs2230931  | chr17:1891886  | synonymous | A:G | 0.527 | 100.0 | 0.267 | 535 (53.3%) | 402 (40.0%) | 67 (6.7%)   |
|              | rs12051574 | chr17:1896306  | intron     | G:A | 0.051 | 100.0 | 0.196 | 659 (65.6%) | 296 (29.5%) | 49 (4.9%)   |
|              | rs17339284 | chr17:1896364  | intron     | G:A | 0.709 | 100.0 | 0.213 | 619 (61.7%) | 342 (34.1%) | 43 (4.3%)   |
|              | rs7406953  | chr17:1896662  | intron     | A:G | 0.044 | 100.0 | 0.193 | 664 (66.1%) | 292 (29.1%) | 48 (4.8%)   |
|              | rs4790838  | chr17:1896793  | intron     | A:G | 0.139 | 100.0 | 0.358 | 403 (40.1%) | 484 (48.2%) | 117 (11.7%) |
|              | rs12727    | chr17:1897771  | 3'UTR      | C:G | 0.180 | 99.5  | 0.136 | 751 (75.2%) | 224 (22.4%) | 24 (2.4%)   |
|              | rs17734    | chr17:1897850  | 3'UTR      | A:G | 0.831 | 100.0 | 0.472 | 278 (27.7%) | 505 (50.3%) | 221 (22.0%) |

|              |           |                |            |     |       |       |       |             |             |             |
|--------------|-----------|----------------|------------|-----|-------|-------|-------|-------------|-------------|-------------|
| <i>ERCC2</i> | rs13181   | chr19:45351661 | missense   | A:C | 0.904 | 100.0 | 0.083 | 843 (84.0%) | 155 (15.4%) | 6 (0.6%)    |
|              | rs1052555 | chr19:45352266 | synonymous | G:A | 1.000 | 100.0 | 0.064 | 879 (87.5%) | 121 (12.1%) | 4 (0.4%)    |
|              | rs3916874 | chr19:45353668 | intron     | G:C | 0.632 | 99.8  | 0.181 | 669 (66.8%) | 303 (30.2%) | 30 (3.0%)   |
|              | rs238416  | chr19:45353791 | intron     | G:A | 0.685 | 100.0 | 0.470 | 286 (28.5%) | 493 (49.1%) | 225 (22.4%) |
|              | rs50871   | chr19:45359257 | intron     | A:C | 0.960 | 99.9  | 0.275 | 526 (52.4%) | 402 (40.1%) | 75 (7.5%)   |
|              | rs1799793 | chr19:45364001 | missense   | G:A | 0.240 | 98.7  | 0.059 | 880 (88.8%) | 105 (10.6%) | 6 (0.6%)    |
|              | rs238406  | chr19:45365051 | synonymous | C:A | 0.656 | 99.4  | 0.466 | 280 (28.1%) | 505 (50.6%) | 213 (21.3%) |
|              | rs3810366 | chr19:45370684 | 5'flanking | C:G | 0.402 | 99.9  | 0.497 | 247 (24.6%) | 516 (51.4%) | 240 (23.9%) |
| <i>ERCC1</i> | rs3212986 | chr19:45409478 | 3'UTR      | C:A | 0.104 | 100.0 | 0.336 | 455 (45.3%) | 424 (42.2%) | 125 (12.5%) |
|              | rs3212965 | chr19:45417322 | intron     | G:A | 0.077 | 99.9  | 0.324 | 471 (47.0%) | 414 (41.3%) | 118 (11.8%) |
|              | rs3212964 | chr19:45417538 | intron     | G:A | 0.892 | 98.7  | 0.423 | 331 (33.4%) | 481 (48.5%) | 179 (18.1%) |
|              | rs3212961 | chr19:45419065 | intron     | C:A | 0.573 | 99.9  | 0.462 | 295 (29.4%) | 489 (48.8%) | 219 (21.8%) |
|              | rs3212955 | chr19:45420238 | intron     | A:G | 0.398 | 99.1  | 0.312 | 477 (47.9%) | 415 (41.7%) | 103 (10.4%) |
|              | rs11615   | chr19:45420395 | synonymous | G:A | 0.418 | 100.0 | 0.234 | 594 (59.2%) | 350 (34.9%) | 60 (6.0%)   |
| <i>LIG1</i>  | rs274883  | chr19:48119288 | intron     | A:G | 0.429 | 100.0 | 0.289 | 502 (50.0%) | 424 (42.2%) | 78 (7.8%)   |
|              | rs251690  | chr19:48121469 | intron     | A:G | 0.802 | 100.0 | 0.418 | 342 (34.1%) | 484 (48.2%) | 178 (17.7%) |
|              | rs2288881 | chr19:48136655 | intron     | G:A | 0.727 | 100.0 | 0.161 | 708 (70.5%) | 268 (26.7%) | 28 (2.8%)   |
|              | rs3730931 | chr19:48143984 | intron     | A:G | 0.925 | 100.0 | 0.127 | 765 (76.2%) | 222 (22.1%) | 17 (1.7%)   |
|              | rs20580   | chr19:48151296 | synonymous | A:C | 0.949 | 100.0 | 0.291 | 505 (50.3%) | 413 (41.1%) | 86 (8.6%)   |
|              | rs274861  | chr19:48156481 | intron     | G:A | 0.503 | 100.0 | 0.126 | 764 (76.1%) | 227 (22.6%) | 13 (1.3%)   |
|              | rs4801749 | chr19:48164034 | intron     | A:C | 1.000 | 99.9  | 0.128 | 763 (76.1%) | 224 (22.3%) | 16 (1.6%)   |
|              | rs20579   | chr19:48165573 | 5'UTR      | G:A | 1.000 | 99.8  | 0.127 | 763 (76.1%) | 223 (22.3%) | 16 (1.6%)   |
| <i>POLD1</i> | rs3219281 | chr19:50383830 | 5'flanking | G:A | 0.909 | 100.0 | 0.141 | 739 (73.6%) | 246 (24.5%) | 19 (1.9%)   |
|              | rs3219305 | chr19:50387351 | intron     | C:G | 0.745 | 98.5  | 0.209 | 616 (62.3%) | 332 (33.6%) | 41 (4.1%)   |



|           |                |          |     |       |       |       |             |             |           |
|-----------|----------------|----------|-----|-------|-------|-------|-------------|-------------|-----------|
| rs2546551 | chr19:50393103 | intron   | G:A | 1.000 | 100.0 | 0.153 | 720 (71.7%) | 261 (26.0%) | 23 (2.3%) |
| rs3219341 | chr19:50394760 | intron   | G:A | 0.942 | 100.0 | 0.142 | 739 (73.6%) | 244 (24.3%) | 21 (2.1%) |
| rs1726801 | chr19:50401817 | missense | G:A | 0.780 | 99.0  | 0.140 | 736 (74.0%) | 237 (23.8%) | 21 (2.1%) |
| rs1673041 | chr19:50406132 | intron   | A:C | 0.799 | 99.9  | 0.301 | 492 (49.1%) | 418 (41.7%) | 93 (9.3%) |

---

Supplementary Table1 173 SNPs information

<sup>a</sup> SNP position in GRCh38.p7.

| Patient characteristic | Gastrointestinal Toxicity |                            | Hematological Toxicities |                       |                        |                       |                        |                       |
|------------------------|---------------------------|----------------------------|--------------------------|-----------------------|------------------------|-----------------------|------------------------|-----------------------|
|                        |                           |                            | Neutropenia              |                       | Anemia                 |                       | Thrombocytopenia       |                       |
|                        | No./Total <sup>c</sup>    | <i>P</i> <sup>d</sup>      | No./Total <sup>c</sup>   | <i>P</i> <sup>d</sup> | No./Total <sup>c</sup> | <i>P</i> <sup>d</sup> | No./Total <sup>c</sup> | <i>P</i> <sup>d</sup> |
| Gender                 |                           | <b>1.4×10<sup>-6</sup></b> |                          | 0.654                 |                        | 0.309                 |                        | 0.056                 |
|                        | Male                      | 37/674                     | 79/659                   |                       | 18/666                 |                       | 19/670                 |                       |
|                        | Female                    | 43/290                     | 36/276                   |                       | 11/278                 |                       | 15/280                 |                       |
| Age                    |                           | 0.472                      |                          | 0.260                 |                        | 0.455                 |                        | 0.891                 |
|                        | ≤58                       | 38/495                     | 54/485                   |                       | 17/489                 |                       | 18/492                 |                       |
|                        | >58                       | 42/469                     | 61/450                   |                       | 12/455                 |                       | 16/458                 |                       |
| ECOG PS                |                           | 0.197                      |                          | 0.674                 |                        | 0.099                 |                        | 1.000                 |
|                        | 0-1                       | 70/869                     | 101/843                  |                       | 24/852                 |                       | 31/858                 |                       |
|                        | 2                         | 10/82                      | 11/81                    |                       | 5/81                   |                       | 3/81                   |                       |
| Smoking Status         |                           | <b>1.5×10<sup>-4</sup></b> |                          | 0.820                 |                        | <b>0.042</b>          |                        | 0.447                 |
|                        | Non-smoker <sup>a</sup>   | 49/408                     | 47/393                   |                       | 17/395                 |                       | 16/398                 |                       |
|                        | Ever smoker               | 29/552                     | 67/538                   |                       | 11/545                 |                       | 17/548                 |                       |
| TNM Stage              |                           | 0.583                      |                          | 0.283                 |                        | <b>0.020</b>          |                        | 0.927                 |
|                        | IIIA                      | 6/80                       | 6/76                     |                       | 0/81                   |                       | 3/81                   |                       |
|                        | IIIB                      | 20/283                     | 30/270                   |                       | 4/275                  |                       | 9/275                  |                       |
|                        | IV                        | 54/596                     | 79/584                   |                       | 25/583                 |                       | 22/589                 |                       |
| Histological Type      |                           | 0.650                      |                          | 0.978                 |                        | 0.368                 |                        | 0.499                 |
|                        | Adenocarcinoma            | 52/609                     | 74/593                   |                       | 23/598                 |                       | 25/601                 |                       |
|                        | Squamous Cell Carcinoma   | 14/213                     | 24/206                   |                       | 3/208                  |                       | 5/209                  |                       |
|                        | Adenosquamous carcinoma   | 2/19                       | 2/20                     |                       | 0/19                   |                       | 1/20                   |                       |
|                        | Others <sup>b</sup>       | 12/123                     | 15/116                   |                       | 3/119                  |                       | 3/120                  |                       |

|                              |        |       |                                        |        |                                        |
|------------------------------|--------|-------|----------------------------------------|--------|----------------------------------------|
| Chemotherapy Regimens        |        | 0.091 | <b><math>3.4 \times 10^{-4}</math></b> | 0.086  | <b><math>5.8 \times 10^{-6}</math></b> |
| Platinum-navelbine           | 30/293 |       | 54/284                                 | 13/292 | 7/295                                  |
| Platinum-gemcitabine         | 21/235 |       | 15/232                                 | 7/232  | 20/233                                 |
| Platinum-paclitaxel          | 17/305 |       | 33/294                                 | 6/295  | 2/295                                  |
| Platinum-docetaxel           | 5/84   |       | 10/80                                  | 0/81   | 1/82                                   |
| Others platinum combinations | 7/47   |       | 3/45                                   | 3/44   | 4/45                                   |

Supplementary Table 2 Covariants for Toxicities

Abbreviations: ECOG PS, Eastern Cooperative Oncology Group performance status; No., numbers; TNM, tumor-node metastasis.

<sup>a</sup> Non-smokers were defined as those who had smoked <1 cigarette per day and for <1 year in their lifetime.

<sup>b</sup> Other carcinomas included mixed cell or undifferentiated carcinoma.

<sup>c</sup> Numbers indicate the patients who experienced grade 3 or 4 toxicities.

<sup>d</sup>  $P < 0.05$  was shown in bold.

| Patient characteristic      | Response Rate           |                            | Clinical Benefit <sup>c</sup> |                       | OS   |                                | PFS  |                                |
|-----------------------------|-------------------------|----------------------------|-------------------------------|-----------------------|------|--------------------------------|------|--------------------------------|
|                             | No./Total <sup>d</sup>  | <i>P</i> <sup>e</sup>      | No./Total <sup>d</sup>        | <i>P</i> <sup>e</sup> | MST  | Log-rank <i>P</i> <sup>e</sup> | MST  | Log-rank <i>P</i> <sup>e</sup> |
| Gender                      |                         | 0.280                      |                               | 0.161                 |      | <b>0.002</b>                   |      | 0.660                          |
|                             | Male                    | 131/689                    | 564/689                       |                       | 18.1 |                                | 7.7  |                                |
|                             | Female                  | 46/286                     | 223/286                       |                       | 22.5 |                                | 9.5  |                                |
| Age                         |                         | 0.176                      |                               | 0.897                 |      | <b>0.003</b>                   |      | 0.340                          |
|                             | ≤58                     | 83/502                     | 406/502                       |                       | 21.3 |                                | 9.5  |                                |
|                             | >58                     | 94/473                     | 381/473                       |                       | 17.2 |                                | 7.7  |                                |
| ECOG PS                     |                         | 0.686                      |                               | <b>0.010</b>          |      | 0.100                          |      | <b>0.001</b>                   |
|                             | 0-1                     | 162/878                    | 718/878                       |                       | 19.4 |                                | 9.3  |                                |
|                             | 2                       | 14/84                      | 59/84                         |                       | 17.9 |                                | 5.4  |                                |
| Smoking Status <sup>a</sup> |                         | 0.338                      |                               | 0.351                 |      | <b>0.014</b>                   |      | 0.540                          |
|                             | Non-smoker              | 69/411                     | 326/411                       |                       | 21.2 |                                | 7.8  |                                |
|                             | Ever smoker             | 108/563                    | 460/563                       |                       | 17.9 |                                | 9.5  |                                |
| TNM Stage                   |                         | <b>2.1×10<sup>-4</sup></b> |                               | 0.138                 |      | 0.132                          |      | 0.122                          |
|                             | IIIA                    | 27/79                      | 70/79                         |                       | 23.0 |                                | 12.6 |                                |
|                             | IIIB                    | 56/284                     | 230/284                       |                       | 19.1 |                                | 9.8  |                                |
|                             | IV                      | 94/607                     | 481/607                       |                       | 19.1 |                                | 8.0  |                                |
| Histological Type           |                         | <b>1.7×10<sup>-7</sup></b> |                               | <b>0.006</b>          |      | 0.057                          |      | 0.850                          |
|                             | Adenocarcinoma          | 78/612                     | 477/612                       |                       | 20.2 |                                | 9.1  |                                |
|                             | Squamous Cell Carcinoma | 62/217                     | 186/217                       |                       | 16.6 |                                | 9.5  |                                |
|                             | Adenosquamous carcinoma | 3/19                       | 13/19                         |                       | 15.3 |                                | 12.5 |                                |
|                             | Others <sup>b</sup>     | 34/127                     | 111/127                       |                       | 18.0 |                                | 7.6  |                                |

|                              |        |              |         |       |      |       |      |                            |
|------------------------------|--------|--------------|---------|-------|------|-------|------|----------------------------|
| Chemotherapy Regimens        |        | <b>0.025</b> |         | 0.507 |      | 0.305 |      | <b>4.0×10<sup>-6</sup></b> |
| Platinum-navelbine           | 73/302 |              | 250/302 |       | 19.9 |       | 13.8 |                            |
| Platinum-gemcitabine         | 37/231 |              | 188/231 |       | 19.8 |       | 9.3  |                            |
| Platinum-paclitaxel          | 49/310 |              | 248/310 |       | 18.3 |       | 6.6  |                            |
| Platinum-docetaxel           | 11/85  |              | 67/85   |       | 17.7 |       | 7.2  |                            |
| Others platinum combinations | 7/47   |              | 34/47   |       | 20.2 |       | 5.1  |                            |

Supplementary table 3 Covariants for Response and Survival

Abbreviations: ECOG PS, Eastern Cooperative Oncology Group performance status; MST, median survival time (months); No., numbers; OS, overall survival (months); PFS, progression-free survival (months); TNM, tumor-node metastasis;

- a. Non-smokers were defined as those who had smoked <1 cigarette per day and for <1 year in their lifetime.
- b. Other carcinomas included mixed cell or undifferentiated carcinoma.
- c. Clinical benefit was defined as patients with response of complete response (CR), partial response (PR) or stable disease (SD).
- d. Numbers indicate the patients who clinical benefit in the same genotype group.
- e. *P*<0.05 was shown in bold; Data in italics means Fisher's Exact Test was used.
